# Supplementary material
Source: PubMed Central journal article supplement (PMC1782362)

Naghavi et al Fig S1

### cDNA Library Screening

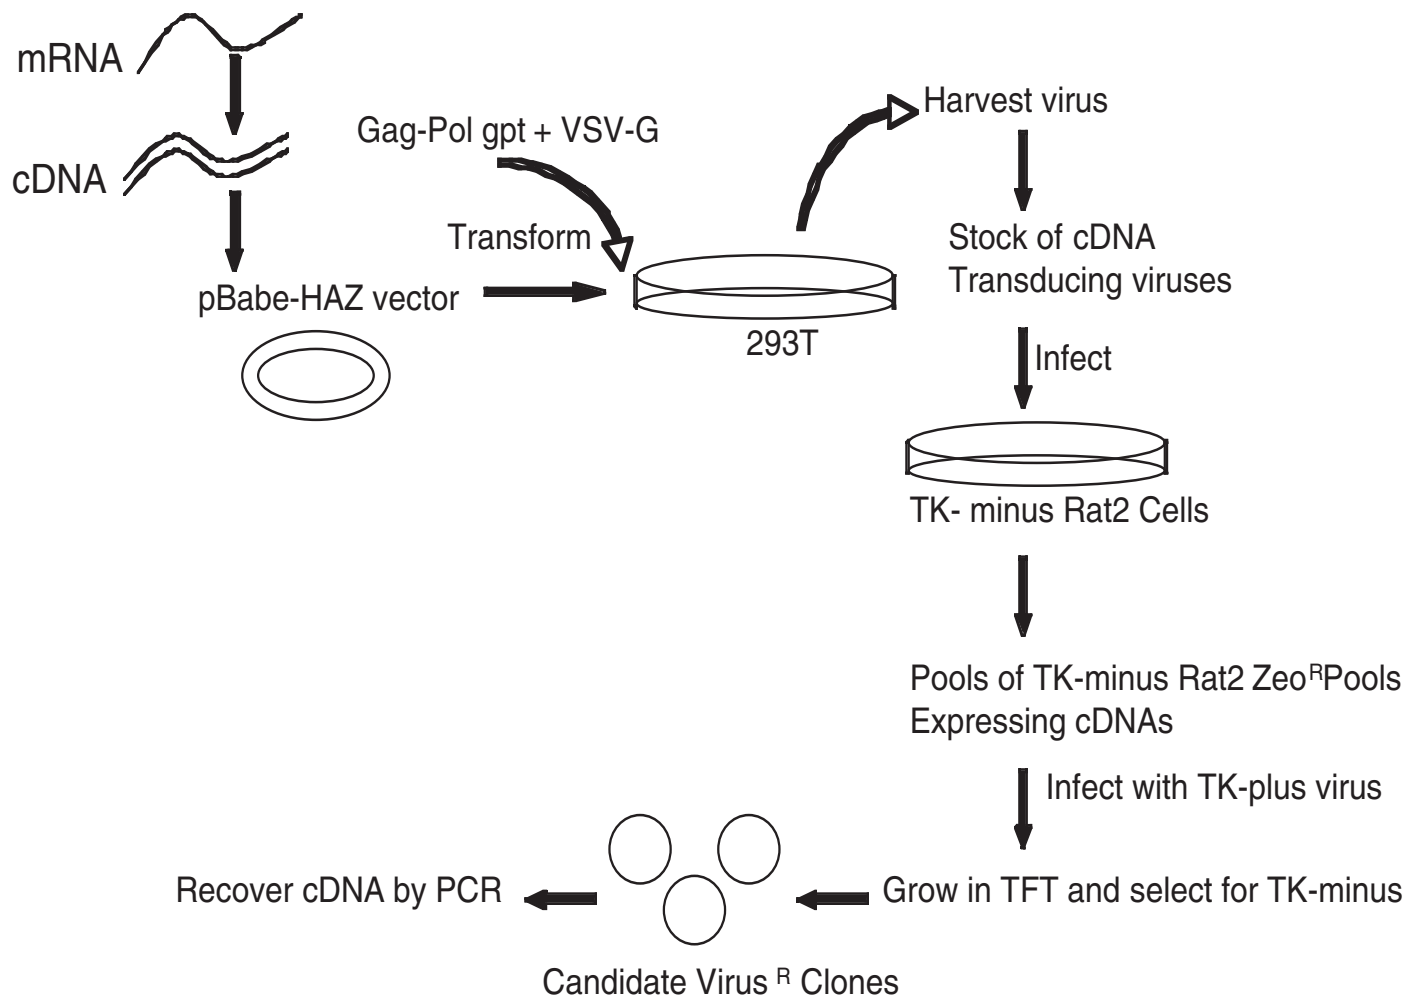

Supplement: 7601475s1.pdf [file 7601475s1.pdf]

**A**

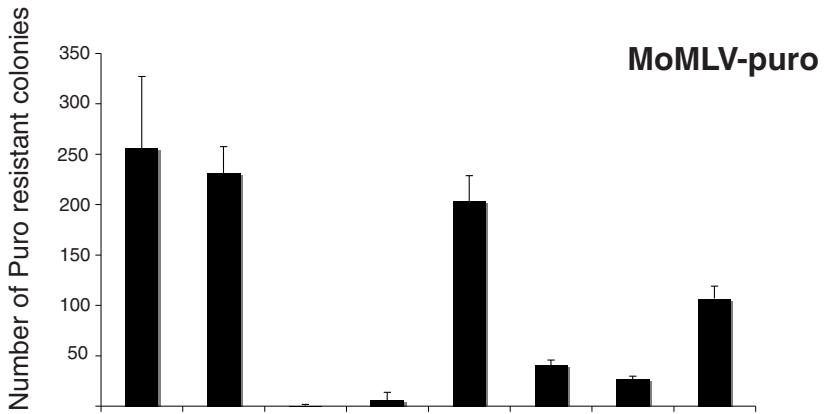

**B**

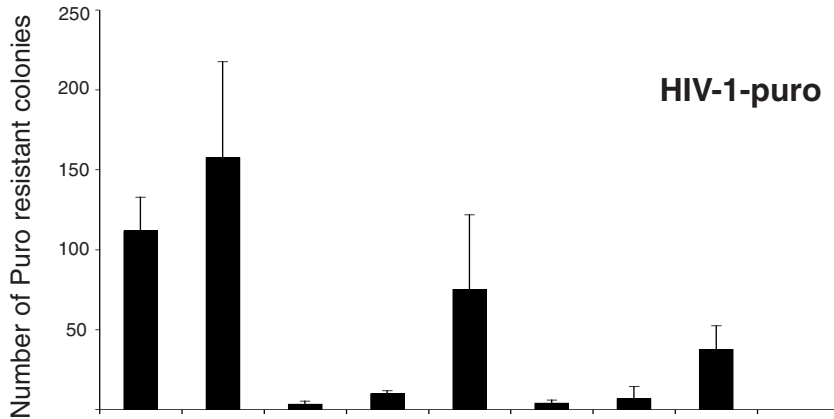

**C**

N-Msn-Zeo →

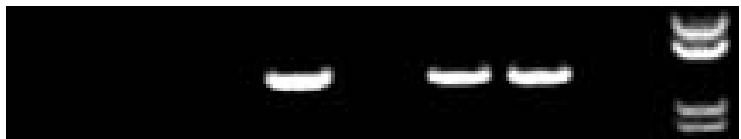

**D**

GAPDH →

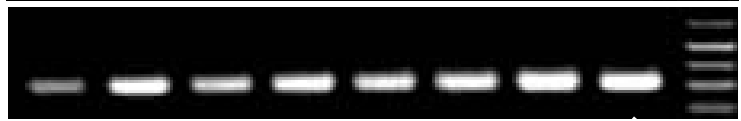

Rat2

Rat2-HAZ

R4-7

RL4

RL4-cre:1

RL4-cre:7

RL4-cre:10

M

M

Supplement: 7601475s2.pdf [file 7601475s2.pdf]

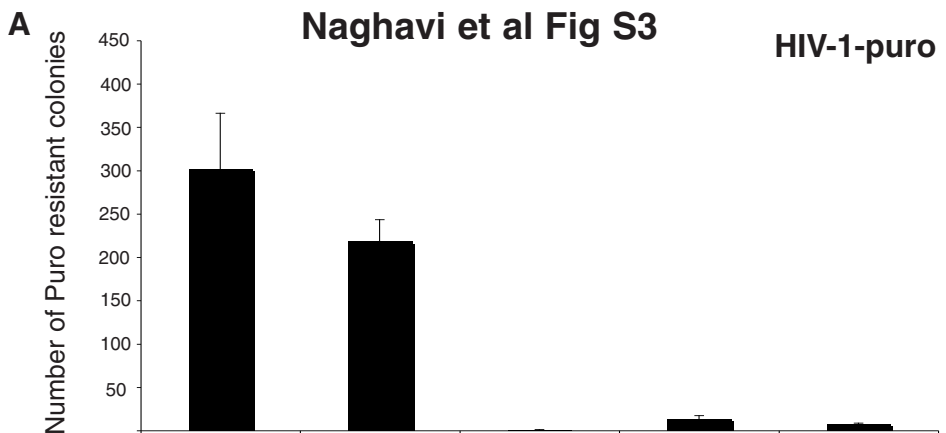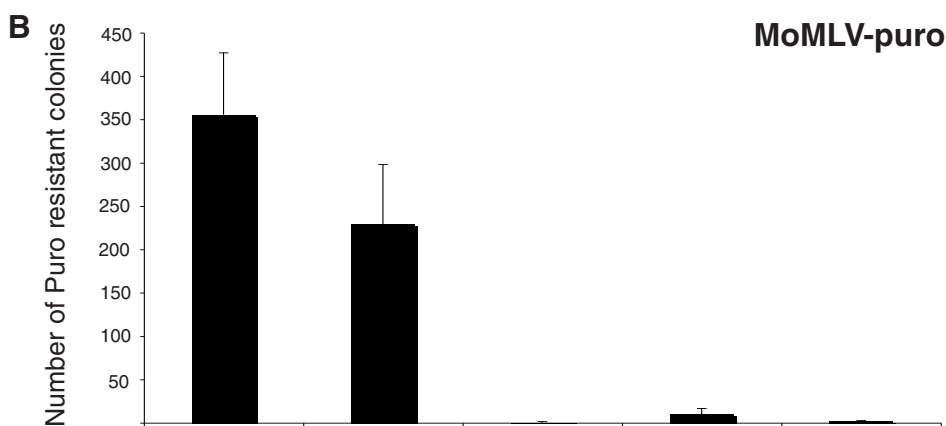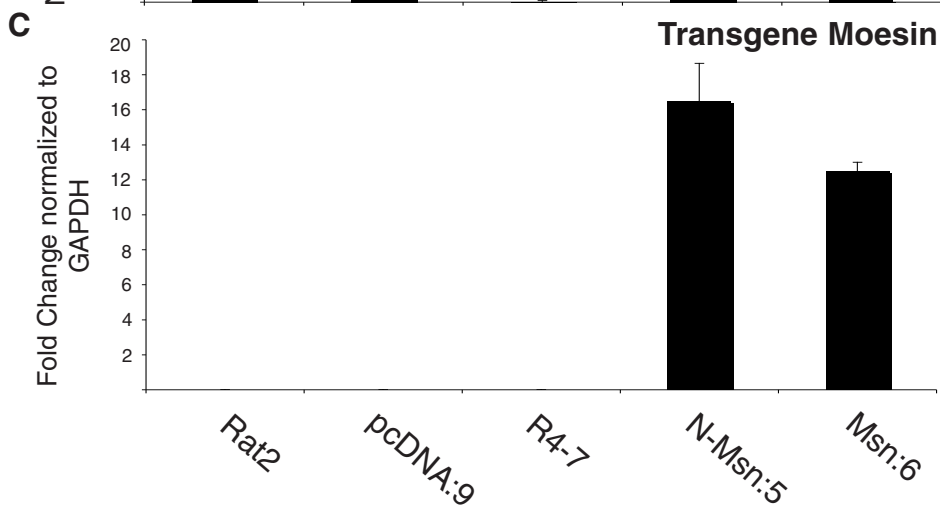

Supplement: 7601475s3.pdf [file 7601475s3.pdf]

# Naghavi et al Fig S4

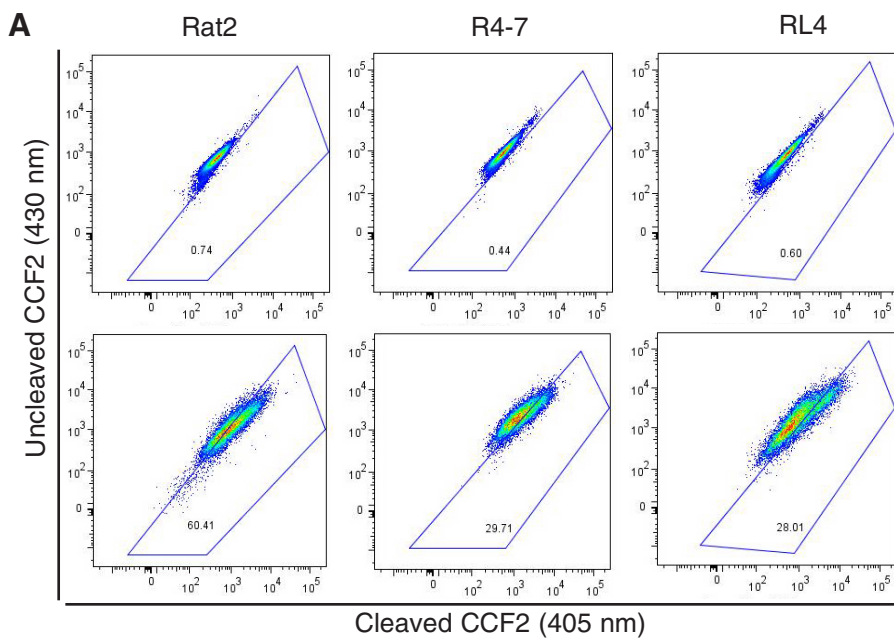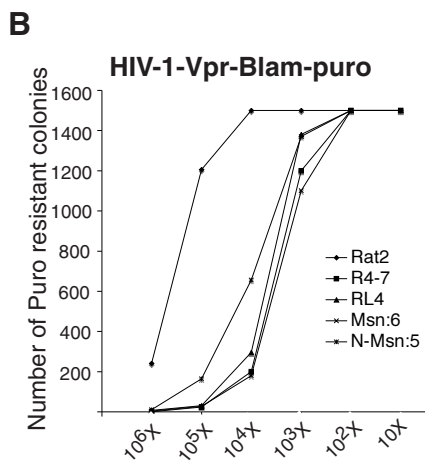

Supplement: 7601475s4.pdf [file 7601475s4.pdf]

# Naghavi et al Fig S5

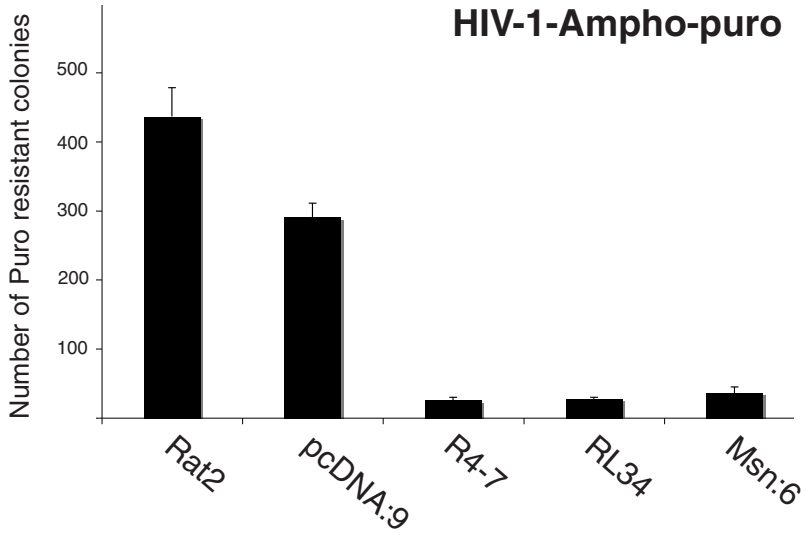

Supplement: 7601475s5.pdf [file 7601475s5.pdf]

Naghavi et al Fig S6

A) Glu-MTs

Rat2-HAZ

RL4-cre:1

RL4-cre:10

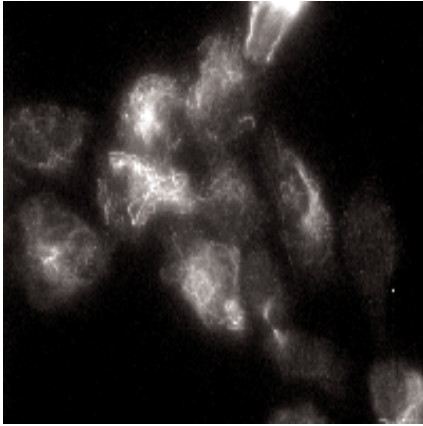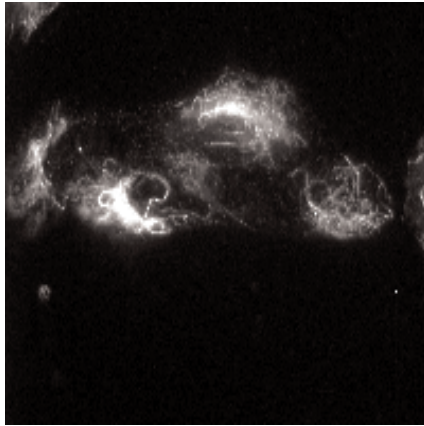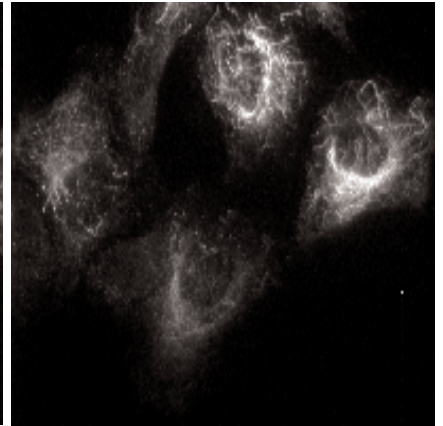

B) Tyr-MTs

Rat2-HAZ

RL4-cre:1

RL4-cre:10

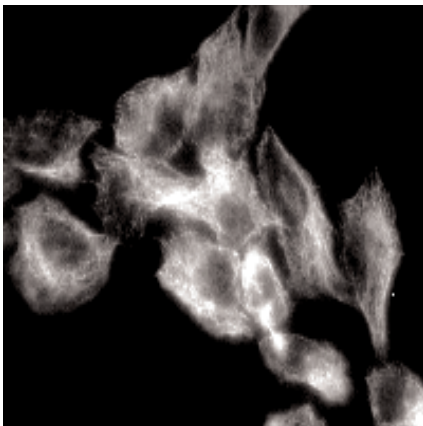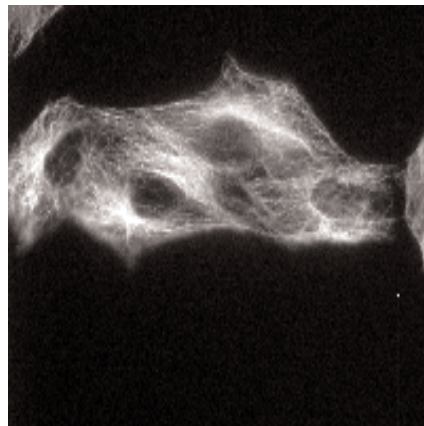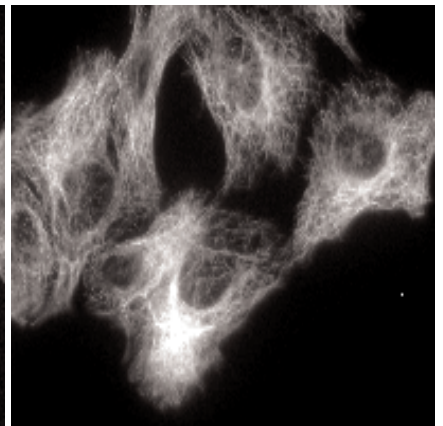

Supplement: 7601475s6.pdf [file 7601475s6.pdf]
